# Supplementary material
Source: PubMed Central journal article supplement (PMC3272152)
Supplement: NIHMS337425-supplement-1.pdf [file NIHMS337425-supplement-1.pdf]

# Supplemental Figure 1 Buis et al.

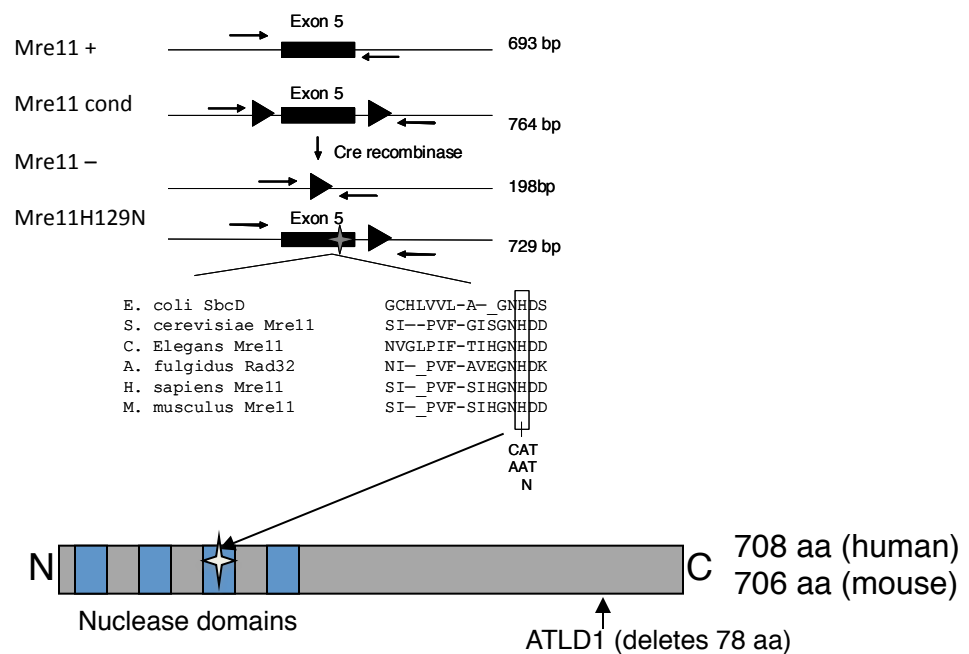

## Supplemental Figure 1. Four mouse germline alleles of Mre11.

*Mre11*<sup>+</sup> (wild-type), *Mre11*<sup>cond</sup> (Cre/LoxP conditional), *Mre11*<sup>-</sup> (null) and *Mre11*<sup>H129N</sup> (nuclease deficient). Cre mediated recombination of LoxP sites (triangles) converts *Mre11*<sup>cond</sup> to *Mre11*<sup>-</sup>. Arrows depict location of two PCR primers used to distinguish the four alleles, using PCR product sizes indicated at right (bp). *Mre11*<sup>-/-</sup> cells lack the entire MRN complex, whereas *Mre11*<sup>-/H129N</sup> cells possess an intact complex with Mre11 lacking endo/exonuclease activities due to targeted mutation of the invariant histidine residue (star). Mre11 protein shown at bottom depicts four highly conserved nuclease motifs, mouse *Mre11*<sup>H129N</sup> mutation (star), and *Mre11*<sup>ATLD1</sup> responsible for ataxia telangiectasia like disorder.

## Supplemental Figure 2 Buis et al.

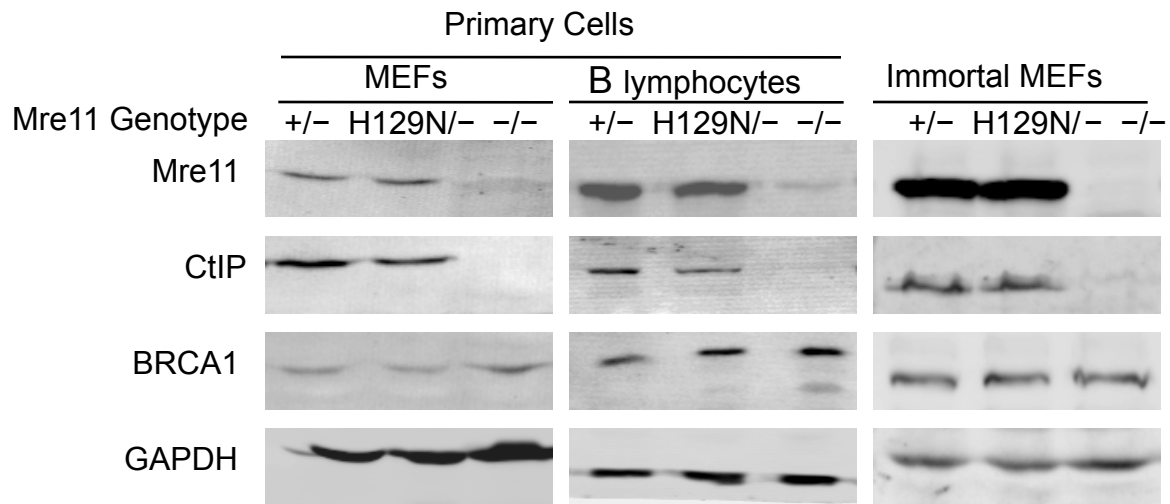

**Supplemental Figure 2. MRN deficiency causes CtIP deficiency.**

Western blot analyses for the indicated proteins (left) performed on extracts from cells of the indicated *Mre11* genotypes (top). *Mre11* alleles are wild-type (+), nuclease deficient (H129N) or null (-). GAPDH is protein loading control.

Supplemental Figure 3 Buis et al.

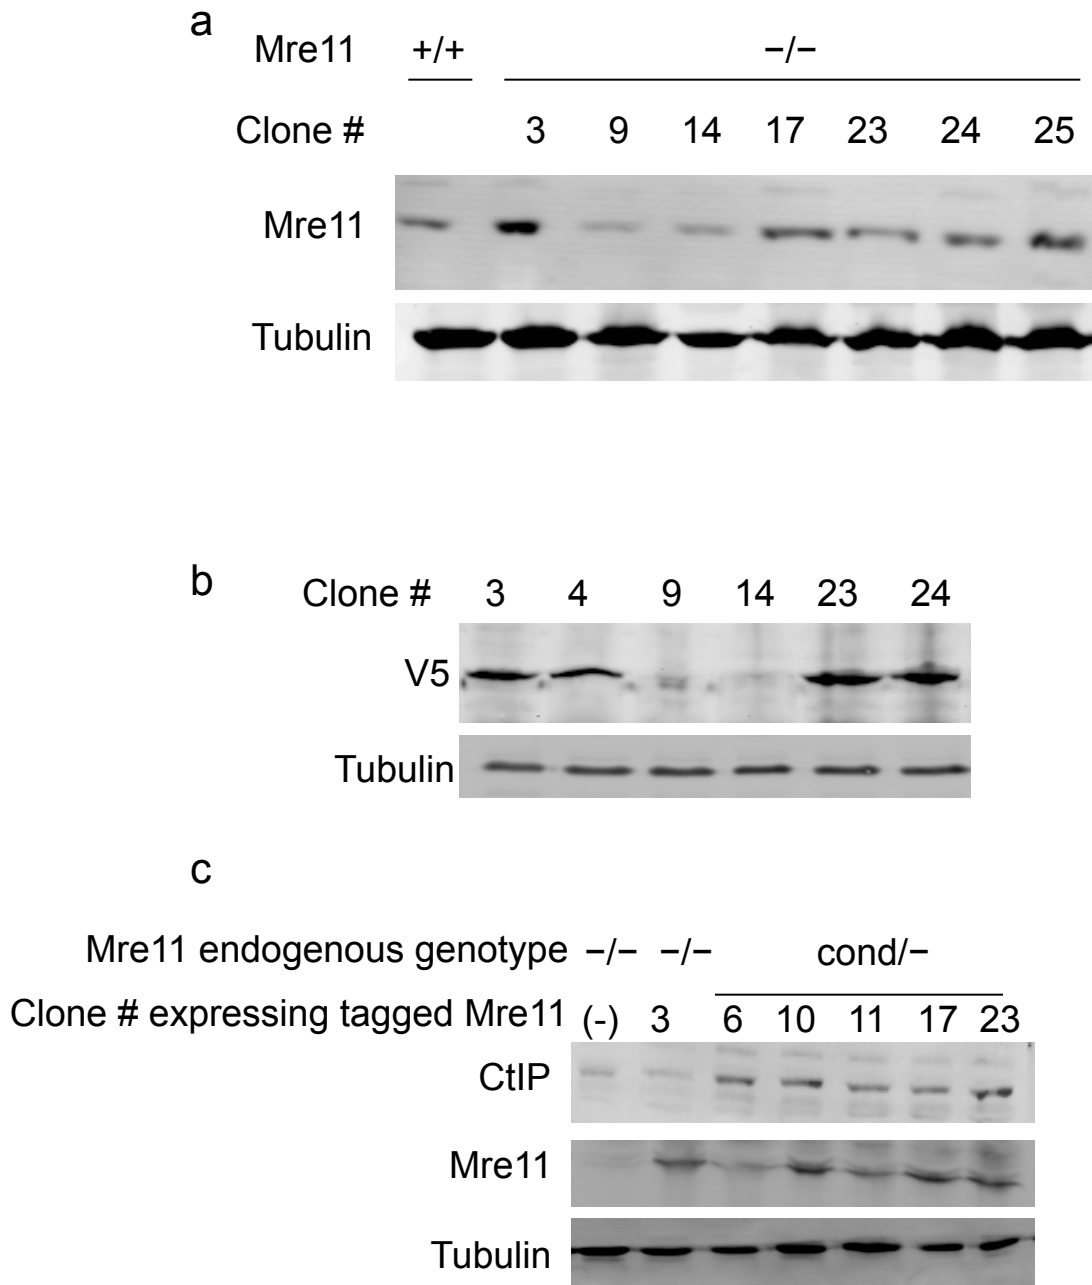

**Supplemental Figure 3. Stable expression of Mre11 cDNA.**

(a,b) Western blots of representative Mre11<sup>-/-</sup> clones stably expressing Mre11 cDNA with a 54 amino acid C-terminal tag comprised of 6his-V5-6his. Tubulin is protein loading control.

(a) Western blot using anti-Mre11 antibody. Clones 23 and 24 express ectopic Mre11 at levels similar to endogenous (left lane), and were used for further studies.

(b) Western blot using anti-V5 antibody identifying Mre11 encoded by cDNA. Representative clones are shown.

(c) Western blots of representative Mre11<sup>+/-</sup> clones stably expressing Mre11 cDNA with a 54 amino acid C-terminal tag comprised of 6his-V5-6his. No impact on CtIP levels is observed when endogenous wild-type Mre11 is present.

# Supplemental Figure 4 Buis et al.

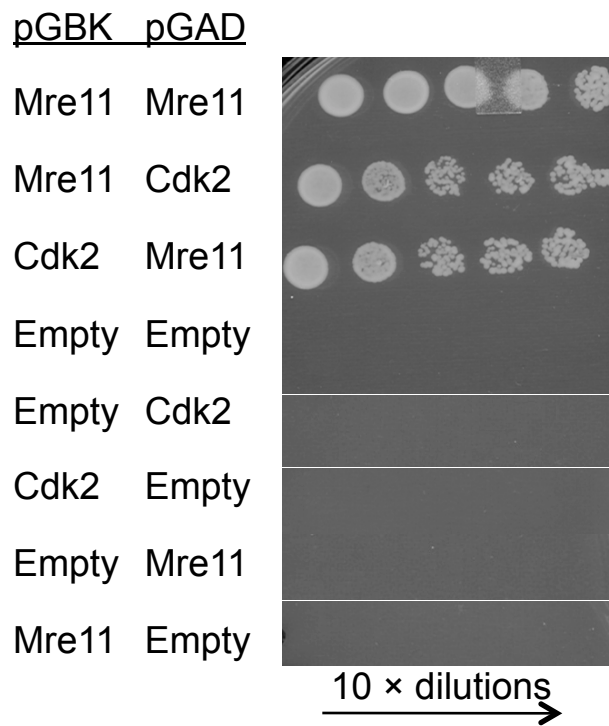

**Supplemental Figure 4. Yeast two hybrid analyses ruling out auto-activation by Mre11 or CDK2.**

pGBK (bait) and pGAD (prey) plasmids expressed Mre11 or CDK2 as indicated (left). Mre11 dimerization is positive control. Empty vectors are negative control.
